# Supplementary material
Source: HighWire-hosted journal article supplement (http://www.qdcxjkg.com/highwire/filestream/113657/field_highwire_adjunct_files/0/ERJ-01627-2012_Disclosures.pdf)
Supplement: ERJ-01627-2012_Disclosures.pdf [file ERJ-01627-2012_Disclosures.pdf]

**M.I. Polkey** reports receiving money personally or to his institution for lecturing consultancy and research on topics relating to exercise and frailty outcomes in COPD from GSK, Chiesi, AZ, Novartis and Lilly.
